# Supplementary material for: Enhancement of nonlinear optical activity in new six-branched dendritic dipolar chromophore
Source: Royal Society of Chemistry journal article supplement (doi:10.1039/c0jm03367g), 2011-01-01
Supplement: c0jm03367g.pdf [file c0jm03367g.pdf]

## *Enhancement of Nonlinear Optical Activity in New Six-branched Dendritic Dipolar Chromophore*

Junkuo Gao, Yuanjing Cui\*, Jiancan Yu, Wenxin Lin, Zhiyu Wang, Guodong Qian\*

State Key Laboratory of Silicon Materials, Department of Materials Science and Engineering, Zhejiang  
University, Hangzhou 310027, China

### **Supporting Information:**

The UV-visible absorption spectra of NLO thin films.

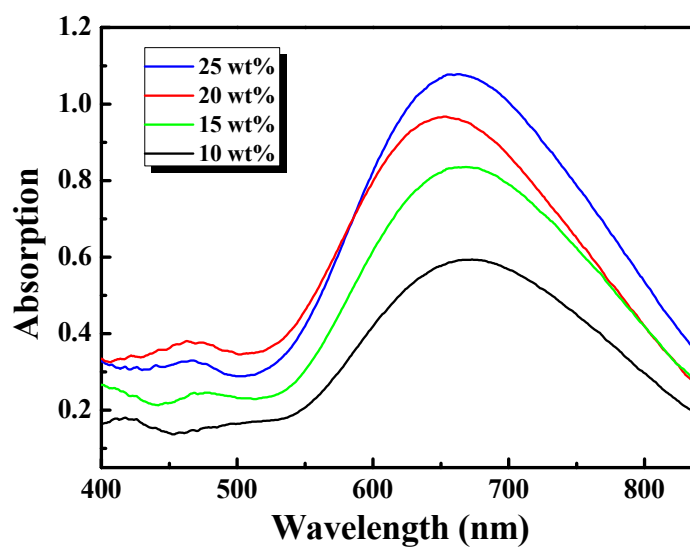

**Figure S1.** UV-vis spectra of chromophore 1 in PVPh.

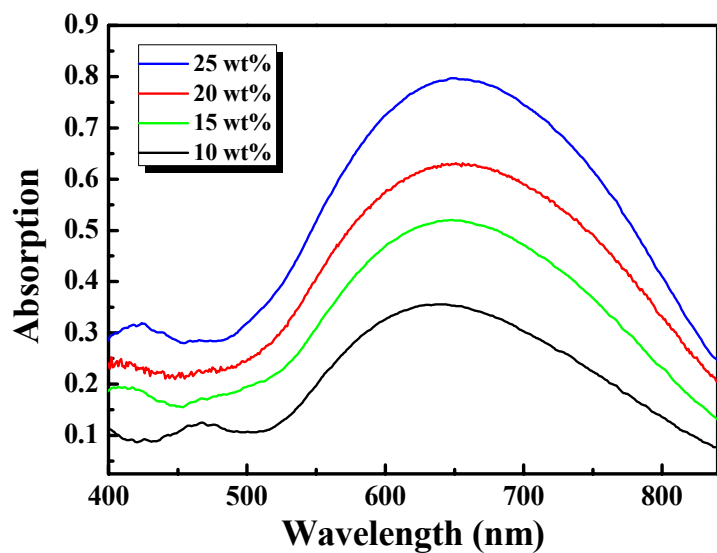

Figure S2. UV-vis spectra of bichromophore **BF1** in PVPh.

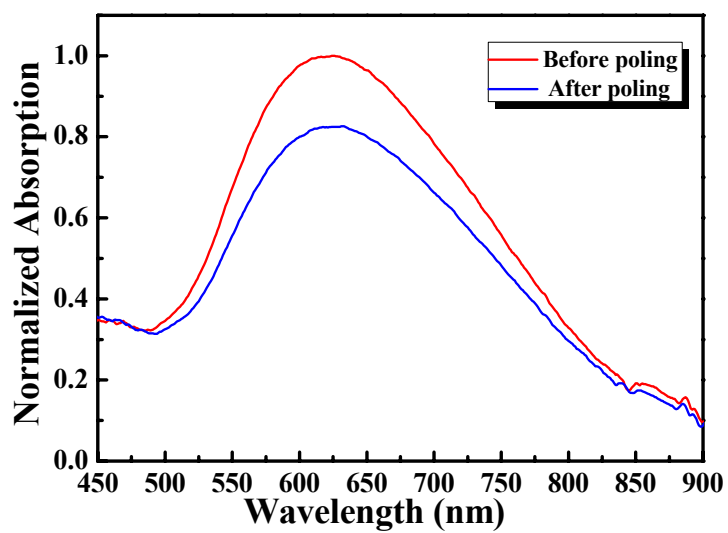

Figure S3. UV-vis spectra of **GGQ1** films.
